# Supplementary material for: Effects of SiO2 modification on the hydrothermal stability of the V2O5/WO3–TiO2 NH3-SCR catalyst: TiO2 structure and vanadia species
Source: Royal Society of Chemistry journal article supplement (doi:10.1039/c9cy00385a), 2019-01-01
Supplement: c9cy00385a1.pdf [file c9cy00385a1.pdf]

Supplementary materials

# Nature of SiO<sub>2</sub> modification on the hydrothermal stability of V<sub>2</sub>O<sub>5</sub>/WO<sub>3</sub>-TiO<sub>2</sub> NH<sub>3</sub>-SCR catalyst: TiO<sub>2</sub> structure and vanadia species

Xuesong Liu,<sup>\*a,b,c</sup> Hongfeng Chen,<sup>d</sup> Xiaodong Wu,<sup>b\*\*</sup> Li Cao,<sup>b</sup> Peng Jiang,<sup>a</sup> Qifan Yu<sup>a</sup>,  
Yue Ma<sup>b</sup>

a College of Chemistry and Chemical Engineering, Shaoxing University, Zhejiang 312000, PR China

b Key Laboratory of Advanced Materials of Ministry of Education, School of Materials Science and Engineering, Tsinghua University, Beijing 100084, PR China

c Zhejiang Hailiang Eco. Mater. Co., Ltd., Zhuji, 311814, China

d Shaoxing Testing Institute of Quality and Technical Supervision, Shaoxing, 312000, China

\* Corresponding author. E-mail address: xuesongliu@usx.edu.cn (X. Liu);  
wuxiaodong@tsinghua.edu.cn (X. Wu)

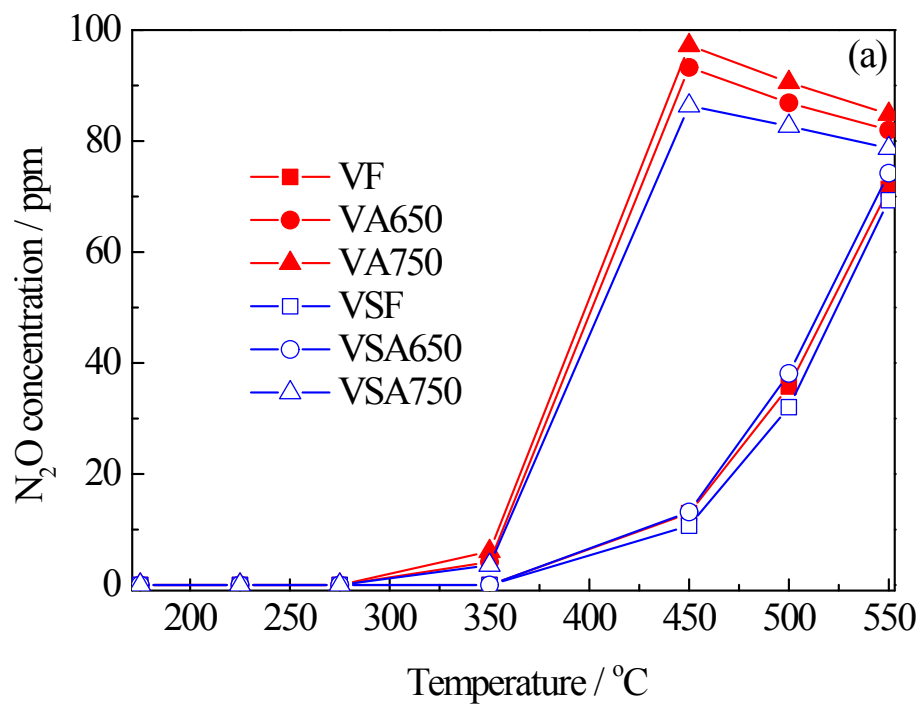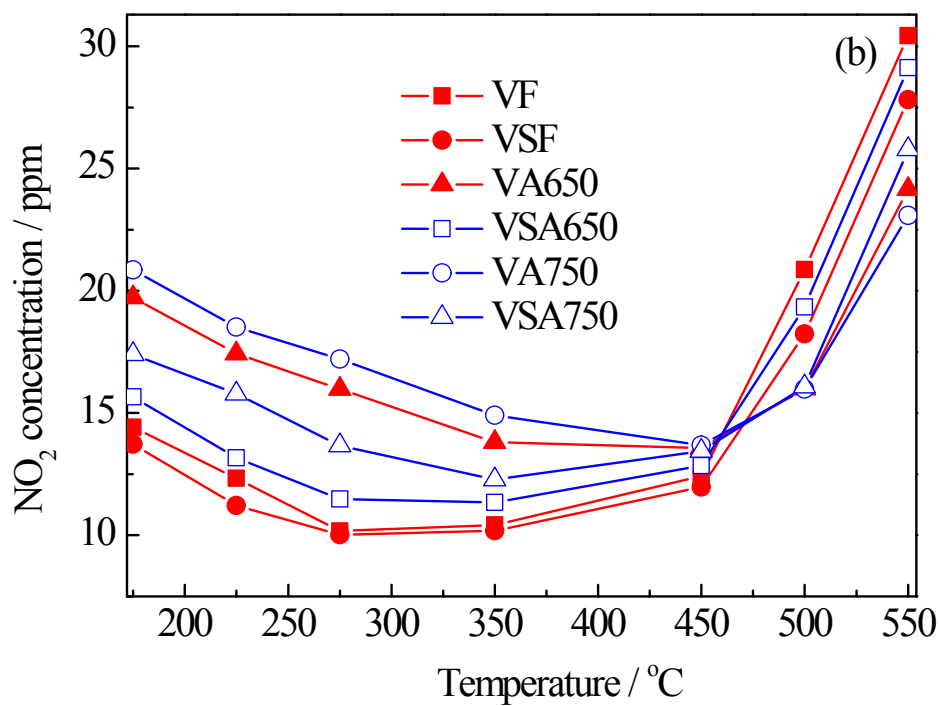

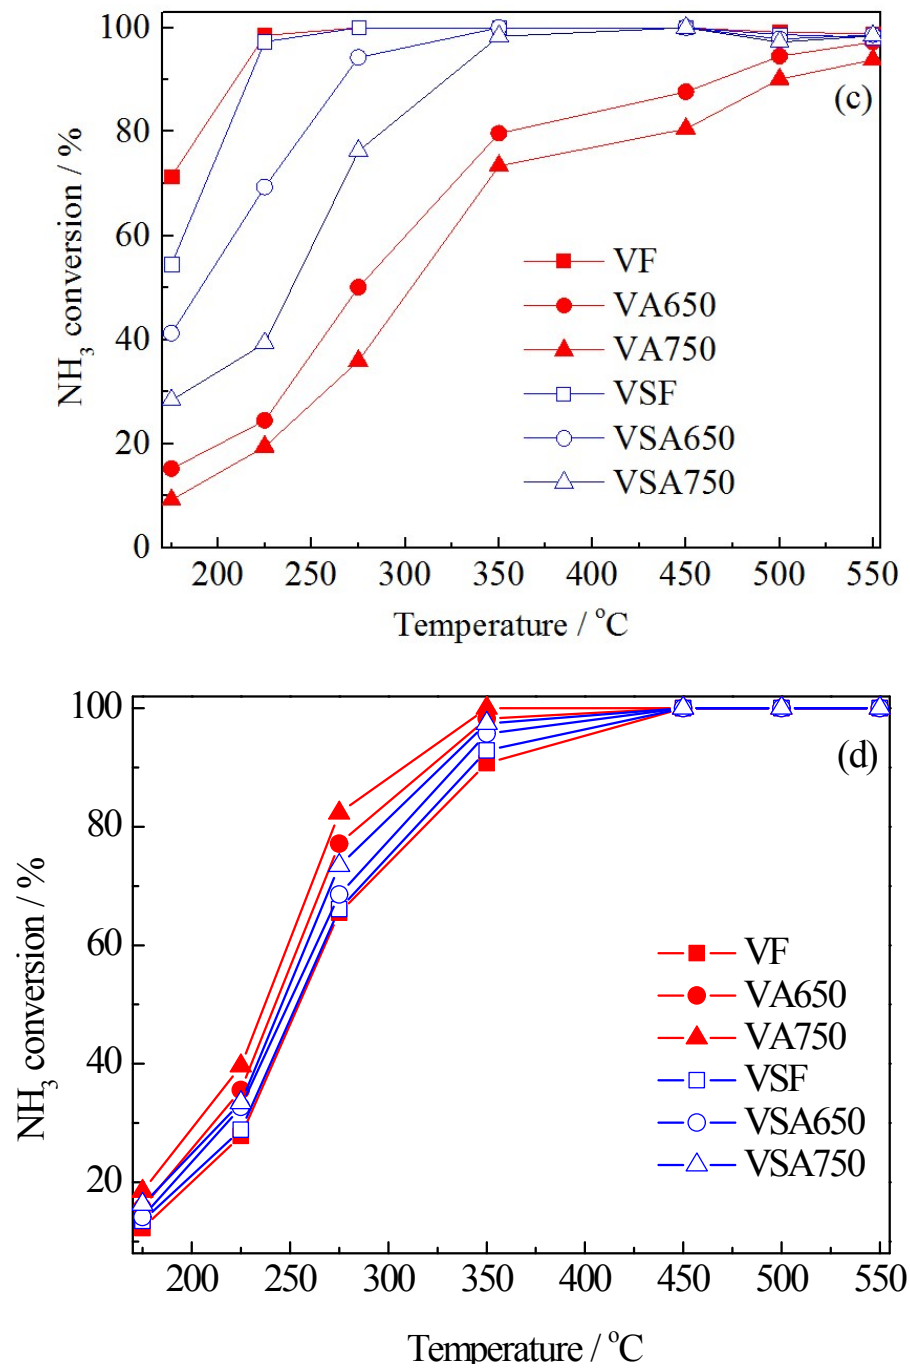

**Fig. S1.** (a) N<sub>2</sub>O generation, (b) NO<sub>2</sub> generation and (c) NH<sub>3</sub> conversion of the catalysts for NH<sub>3</sub>-SCR and (d) NH<sub>3</sub> conversion for NH<sub>3</sub> oxidation. Reaction conditions: 500 ppm NO (when used), 500 ppm NH<sub>3</sub>, 5% O<sub>2</sub>, 10% H<sub>2</sub>O and N<sub>2</sub> in balance, GHSV = 100,000 h<sup>-1</sup>.

The NH<sub>3</sub> conversion was calculated according to Eq. S1.

$$\text{NH}_3 \text{ conversion (\%)} = \frac{\text{NH}_{3in} - \text{NH}_{3out}}{\text{NH}_{3in}} \times 100 \quad (\text{S1})$$

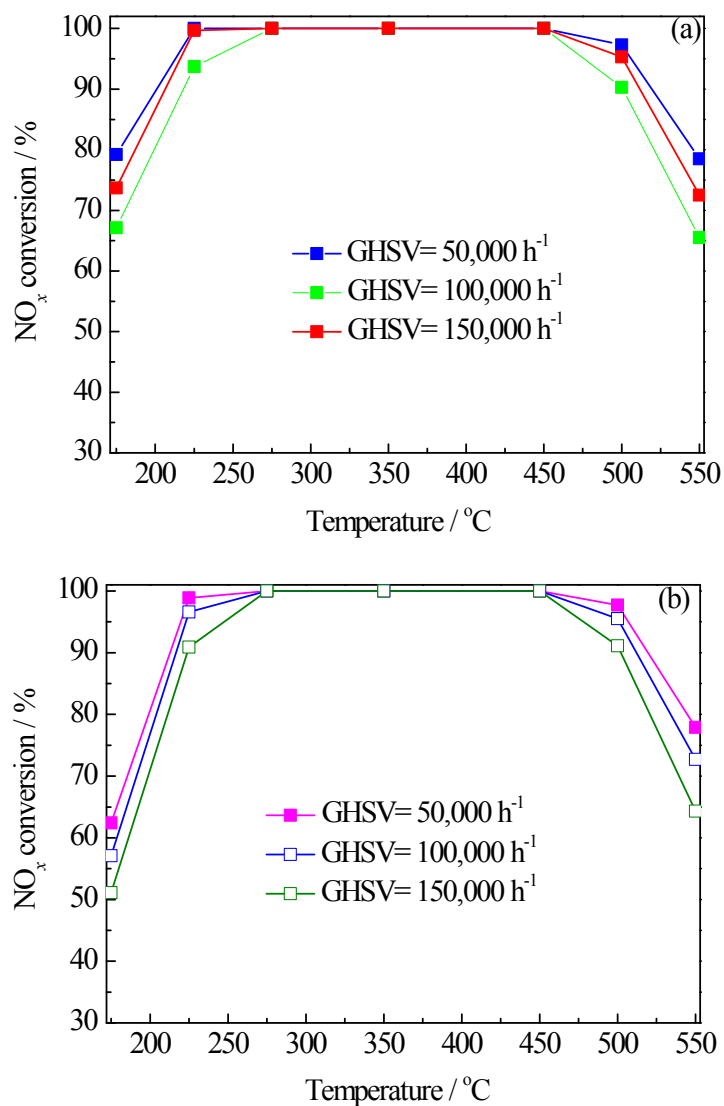

**Fig. S2.** Effect of GHSV on the  $\text{NH}_3$ -SCR activity of (a) VF and (b) VSF. Reaction conditions:

500 ppm  $\text{NO}$ , 500 ppm  $\text{NH}_3$ , 5%  $\text{O}_2$ , 10%  $\text{H}_2\text{O}$  and  $\text{N}_2$  in balance.

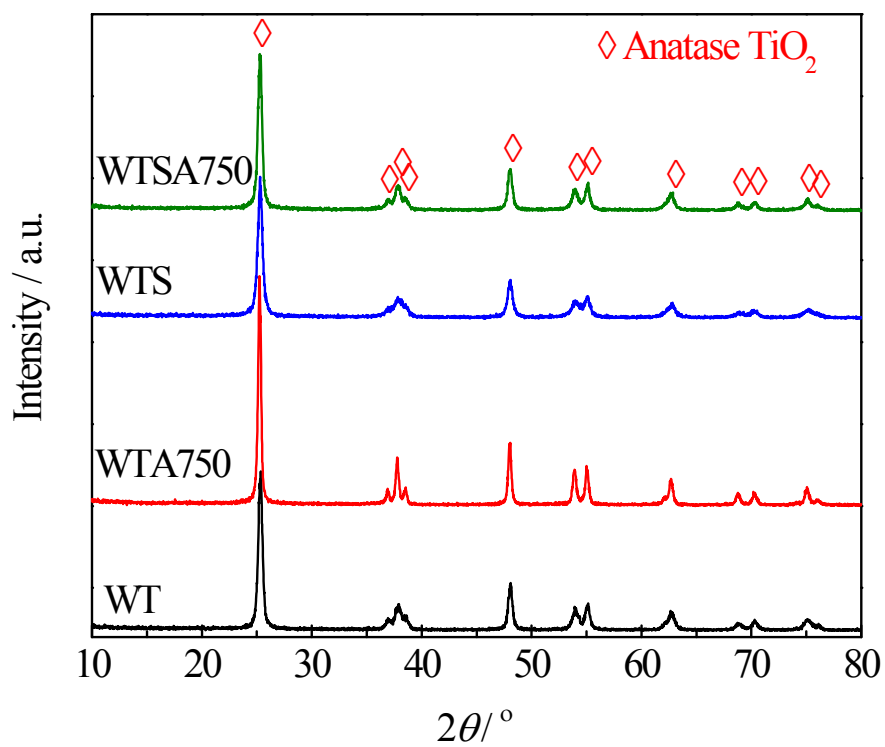

Fig. S3. XRD patterns of the fresh and aged supports.

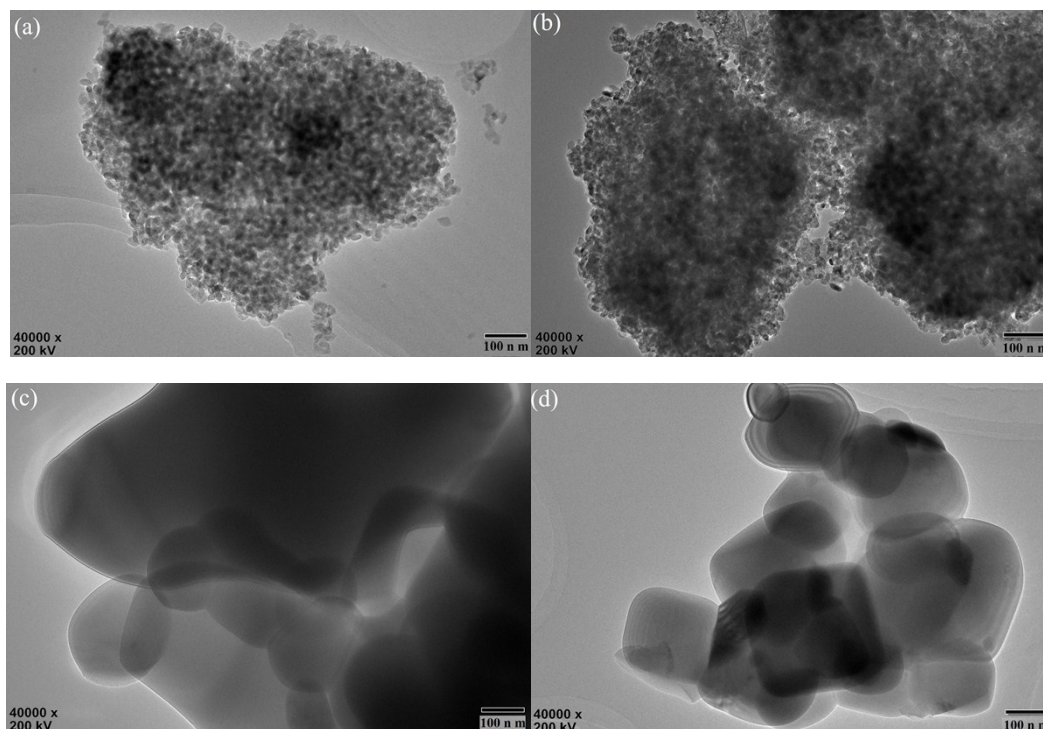

Fig. S4. TEM images of (a) VF, (b) VSF, (c) VA750 and (d) VSA750.

**Table S1**

Structural properties of the samples.

| Sample | Phase composition / % |        | Anatase TiO <sub>2</sub><br>crystallite<br>size / nm | S <sub>BET</sub> /<br>m <sup>2</sup> ·g <sup>-1</sup> |
|--------|-----------------------|--------|------------------------------------------------------|-------------------------------------------------------|
|        | Anatase               | Rutile |                                                      |                                                       |
| WF     | 100                   | -      | 18.7                                                 | 72                                                    |
| WSF    | 100                   | -      | 16.6                                                 | 81                                                    |
| WA650  | -                     | -      | -                                                    | 55                                                    |
| WSA650 | -                     | -      | -                                                    | 73                                                    |
| WA750  | 100                   | -      | 26.3                                                 | 49                                                    |
| WSA750 | 100                   | -      | 18.3                                                 | 53                                                    |
